# Supplementary material
Source: MDPI journal article supplement (https://www.mdpi.com/search?q=molbank-2021-M1258)
Supplement: s001 [file molbank-2021-M1258-s001.pdf]

## “Supplementary Materials”

# 2-Hydroxy-5-(3,5,7-trihydroxy-4-oxo-4*H*-chromen-2-yl)phenyl (*E*)-3-(4-hydroxy-3-methoxyphenyl)acrylate: synthesis, *in silico* analysis and *in vitro* pharmacological evaluation

Antonella Brizzi <sup>1,\*</sup>, Alfonso Trezza <sup>1</sup>, Ottavia Spiga <sup>1</sup>, Samuele Maramai<sup>1</sup>, Francesco Scorzelli  
<sup>2</sup>,  
Simona Saponara <sup>3,\*</sup> and Fabio Fusi <sup>1</sup>

### Table of contents

S1-S2 <sup>1</sup>H- and <sup>13</sup>C-NMR Quercetin.

S3-S4 <sup>1</sup>H- and <sup>13</sup>C-NMR Ferulic acid.

S5-S8 <sup>1</sup>H- and <sup>13</sup>C-NMR Compound 1.

S9-S10 HSQC Compound 1.

S11-S12 HMBC Compound 1.

S13 Table S1. K<sub>Ca</sub>1.1 channel-compounds interaction network.

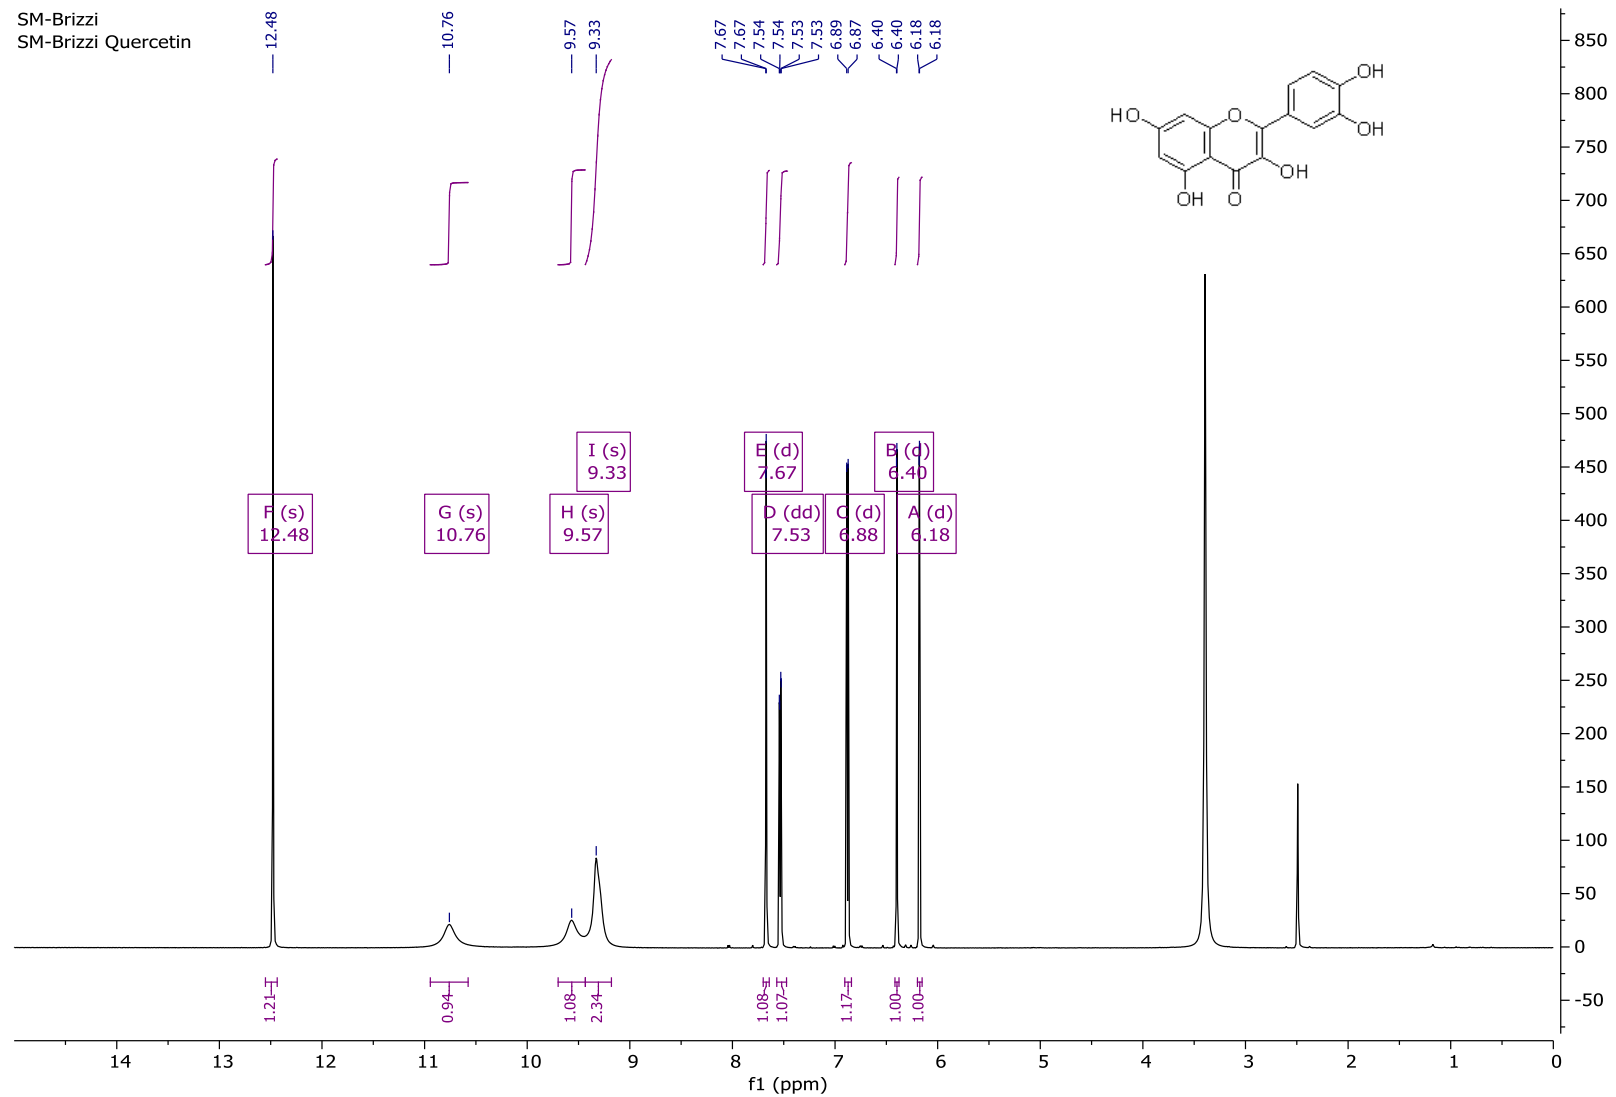

$^1\text{H-NMR}$  (600 MHz,  $\text{DMSO-}d_6$ )  $\delta$ : 12.48 (s, 1H, OH in 5), 10.76 (br s, 1H, OH in 3), 9.57 (br s, 1H, OH in 7), 9.33 (br s, 2H, OH in 3' and 4'), 7.67 (d,  $J = 2.1$  Hz, 1H, H in 2'), 7.53 (dd,  $J = 8.5$  Hz, 2.1 Hz, H in 6'), 6.88 (d,  $J = 8.5$  Hz, 1H, H in 5'), 6.40 (d,  $J = 2.0$  Hz, 1H, H in 8), 6.18 (d,  $J = 1.8$  Hz, 1H, H in 6).

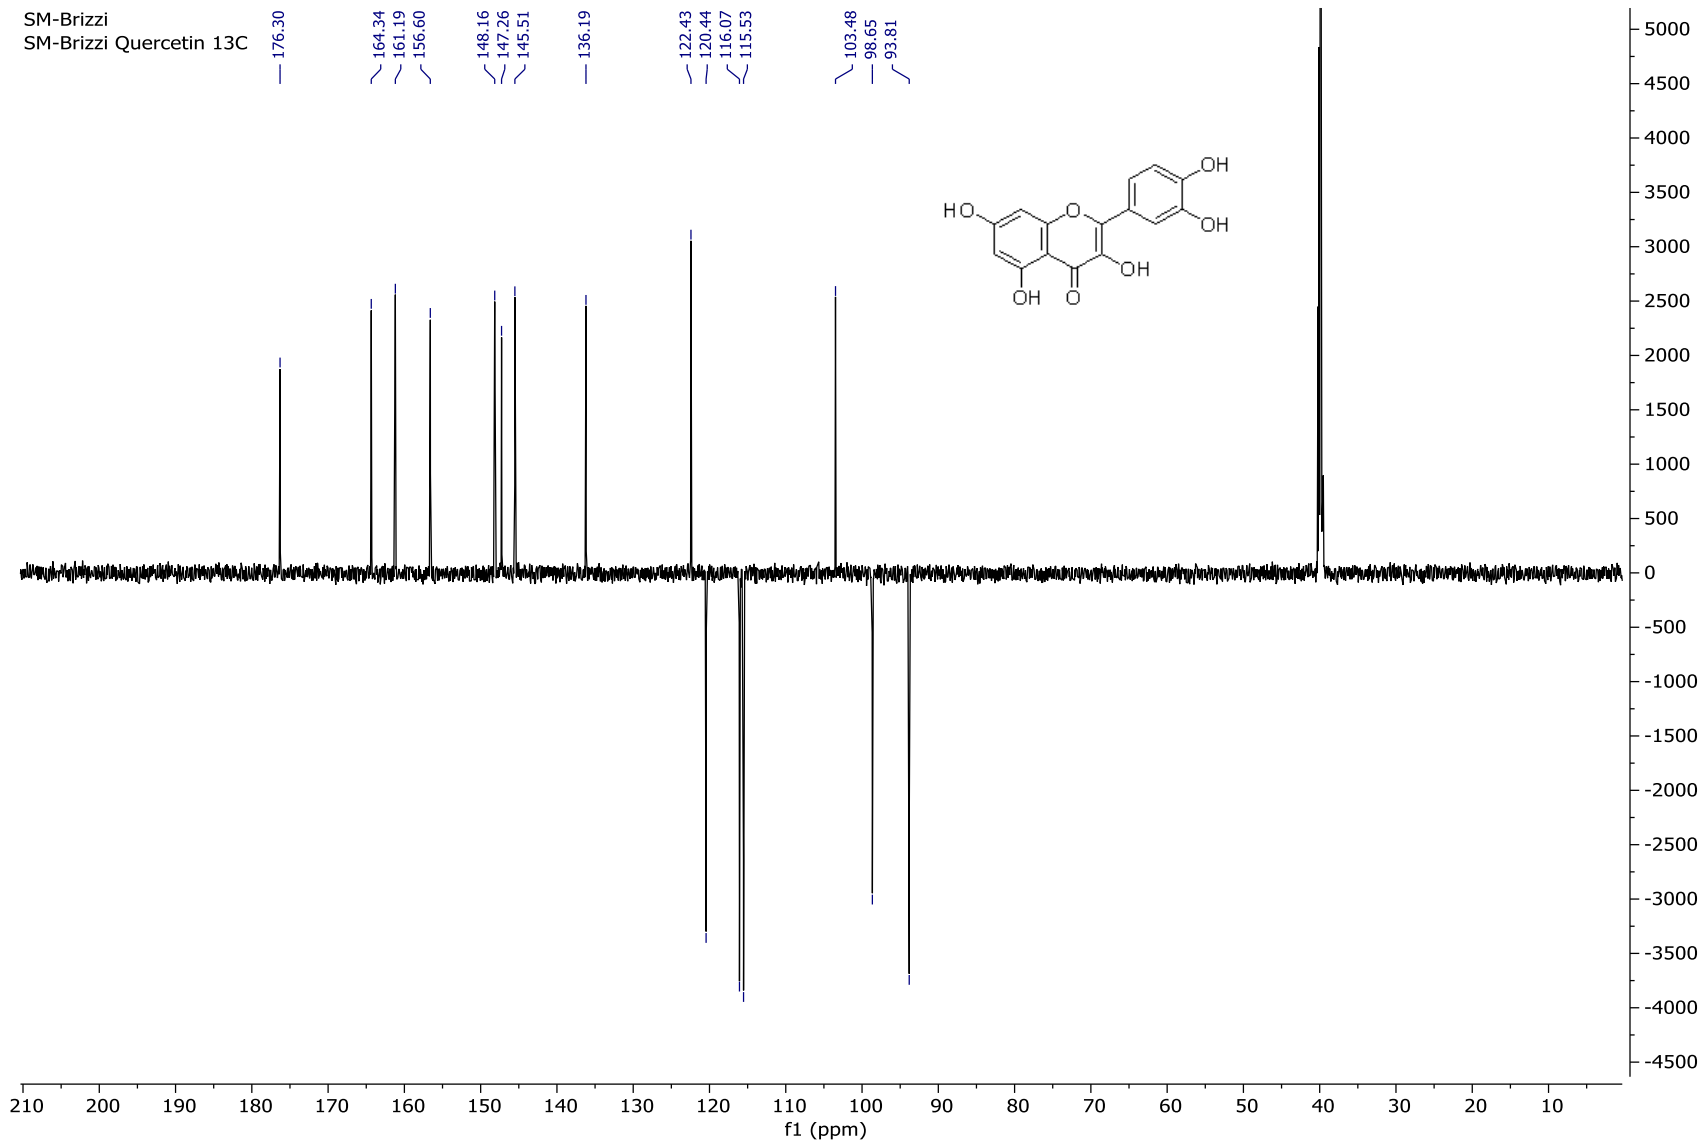

<sup>13</sup>C-NMR (151 MHz, DMSO-*d*<sub>6</sub>) δ: 173.3 (C=O), 164.3 (C in 7), 161.2 (C in 5), 156.6 (C in 8a), 148.2 (C in 4'), 147.3 (C in 2), 145.5 (C in 3'), 136.2 (C in 3), 122.4 (C in 1'), 120.4 (C in 6'), 116.1 (C in 5'), 115.5 (C in 2'), 103.5 (C in 4a), 98.65 (C in 6), 93.8 (C in 8).

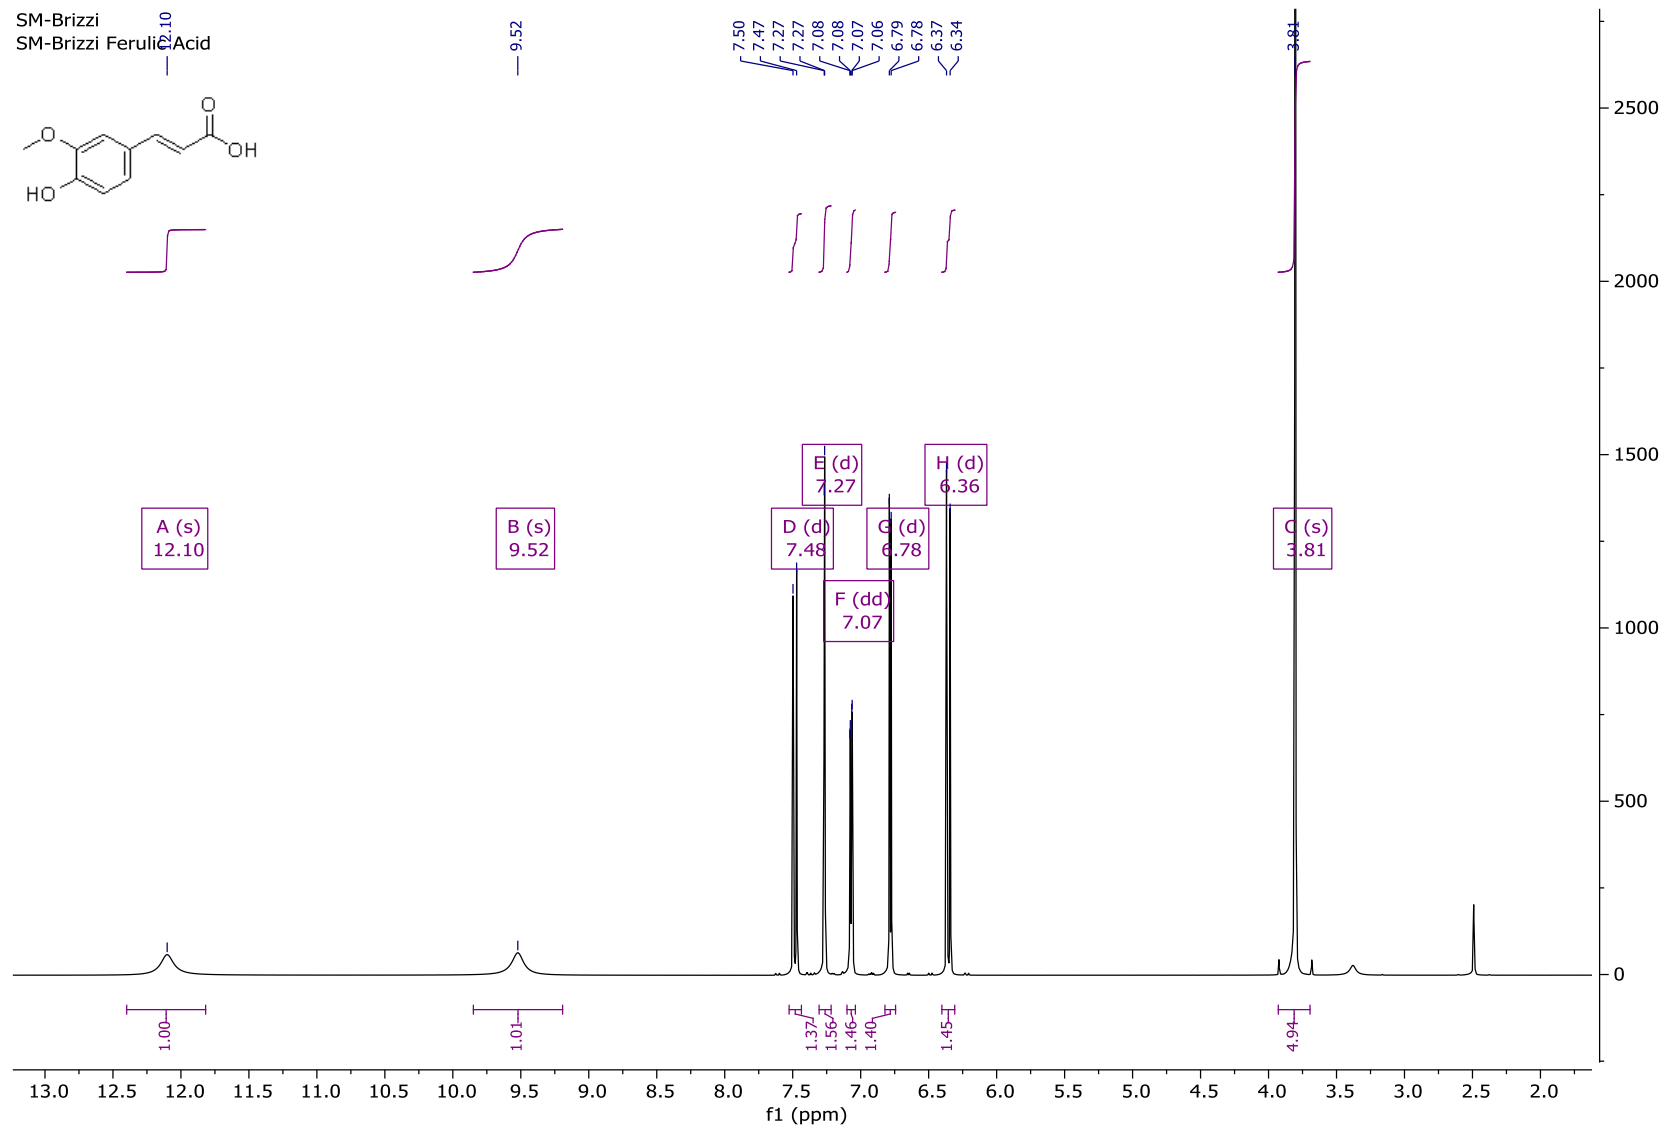

$^1\text{H-NMR}$  (600 MHz,  $\text{DMSO-}d_6$ )  $\delta$ : 12.10 (br s, 1H, COOH), 9.52 (br s, 1H, OH in 4'), 7.48 (d,  $J = 15.9$  Hz, 1H,  $-\text{CH}=\text{CH-Ar}$ ), 7.27 (d,  $J = 1.8$  Hz, 1H, H in 2'), 7.07 (dd,  $J = 8.2$  Hz, 1.8 Hz, H in 6'), 6.78 (d,  $J = 8.1$  Hz, 1H, H in 5'), 6.36 (d,  $J = 15.9$  Hz, 1H,  $\text{CO-CH}=\text{CH-Ar}$ ), 3.81 (s, 3H,  $\text{OCH}_3$ ).

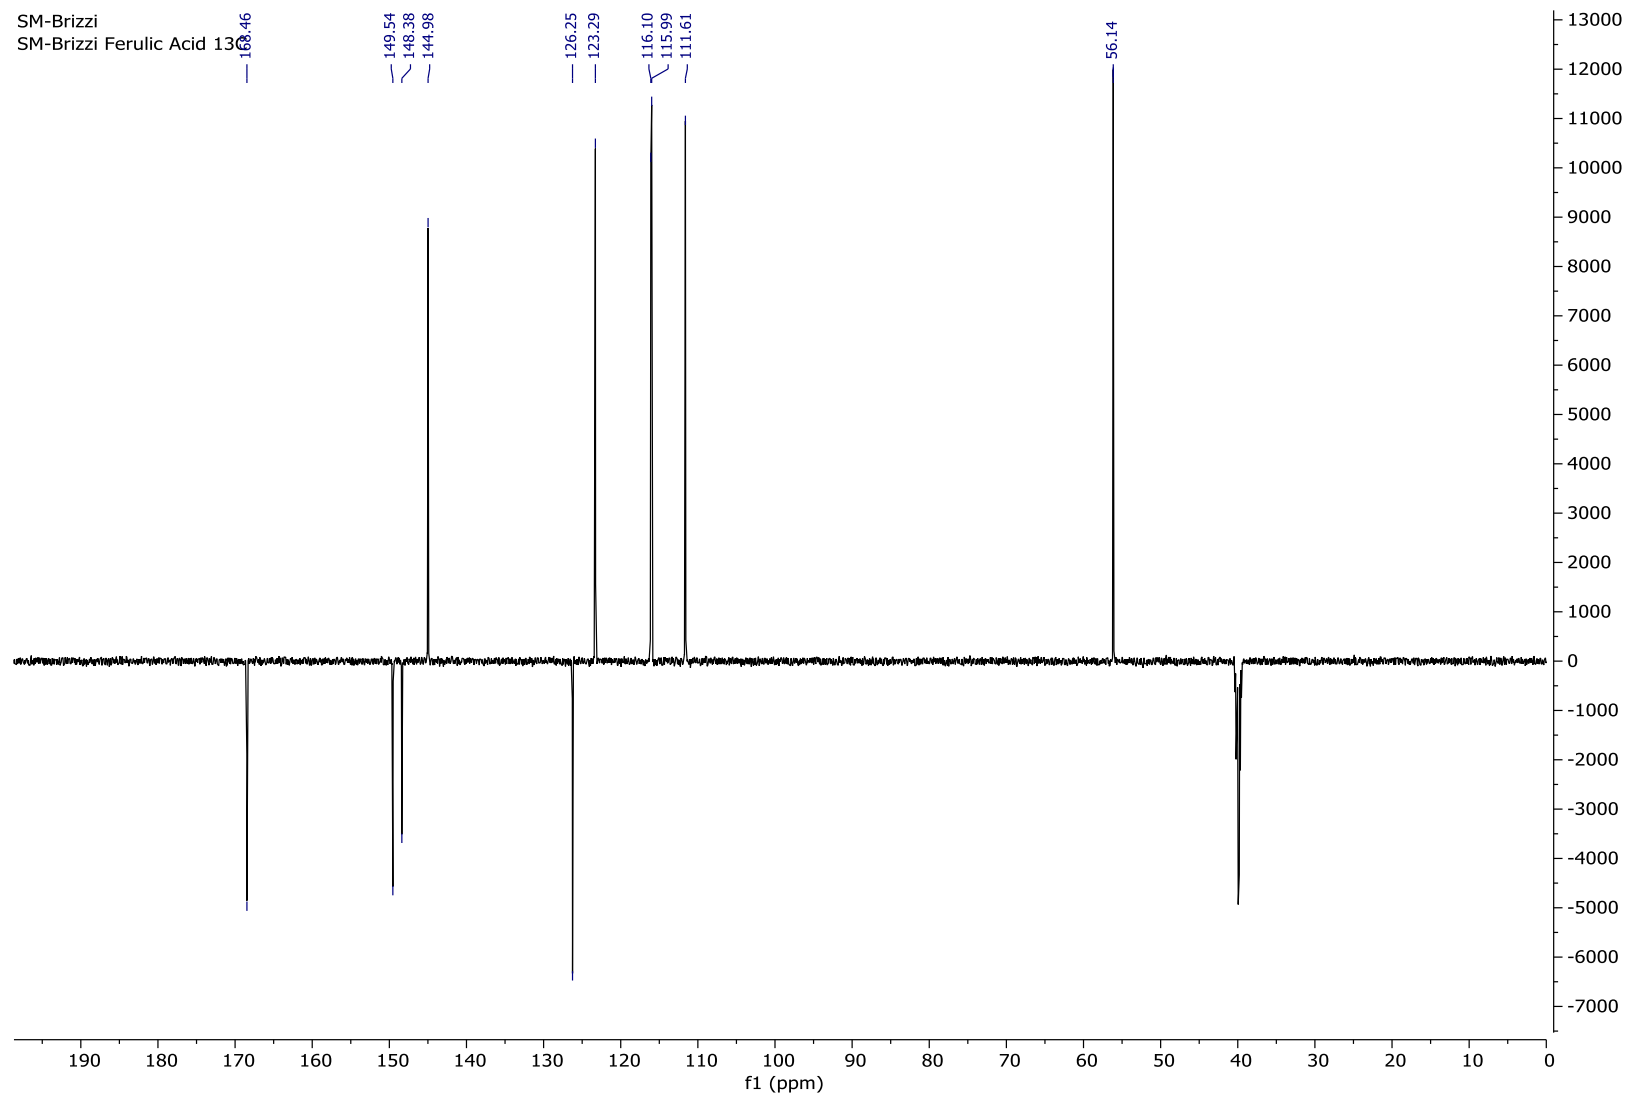

<sup>13</sup>C-NMR (151 MHz, DMSO-*d*<sub>6</sub>) δ: 168.5 (C=O), 149.5 (C in 4'), 148.4 (C in 3'), 145.0 (-CH=CH-Ar), 126.2 (C in 1'), 123.3 (C in 6'), 116.1 (CO-CH=CH-Ar), 116.0 (C in 5'), 111.6 (C in 2'), 56.1 (OCH<sub>3</sub>).

Compd.1

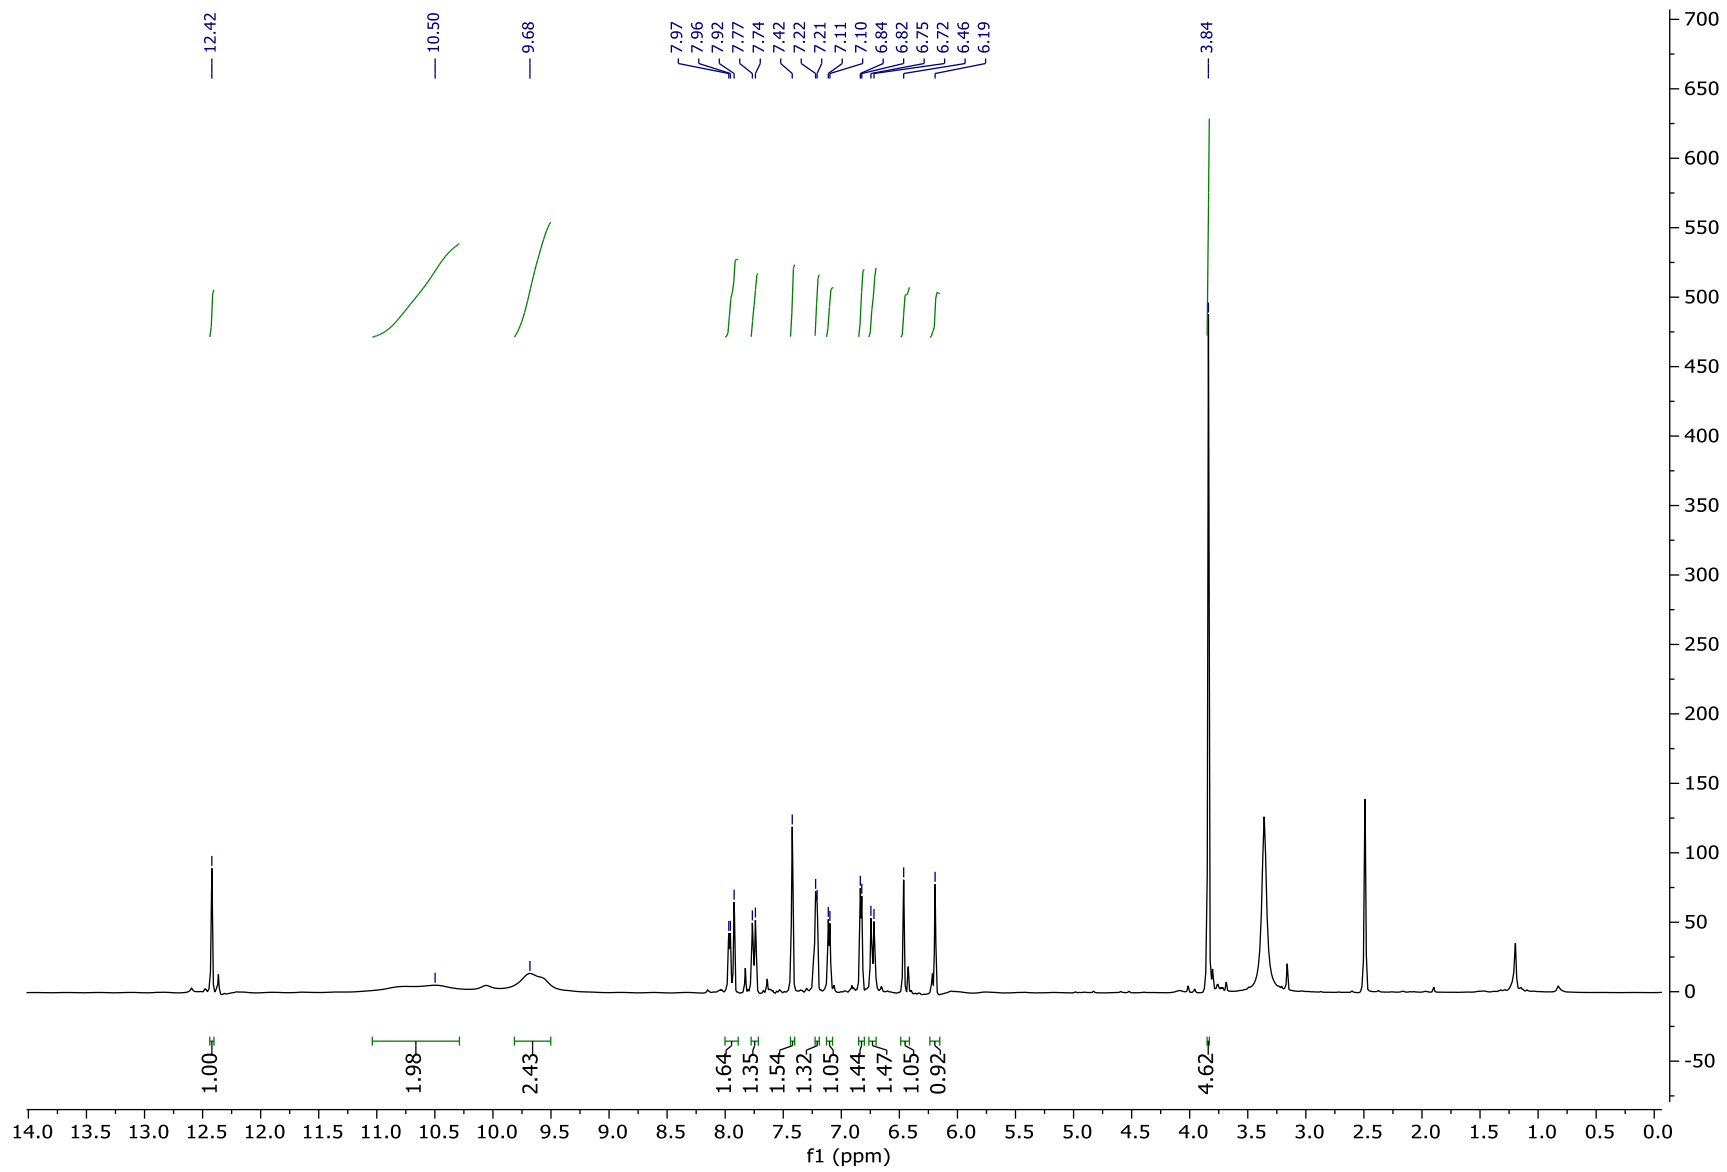

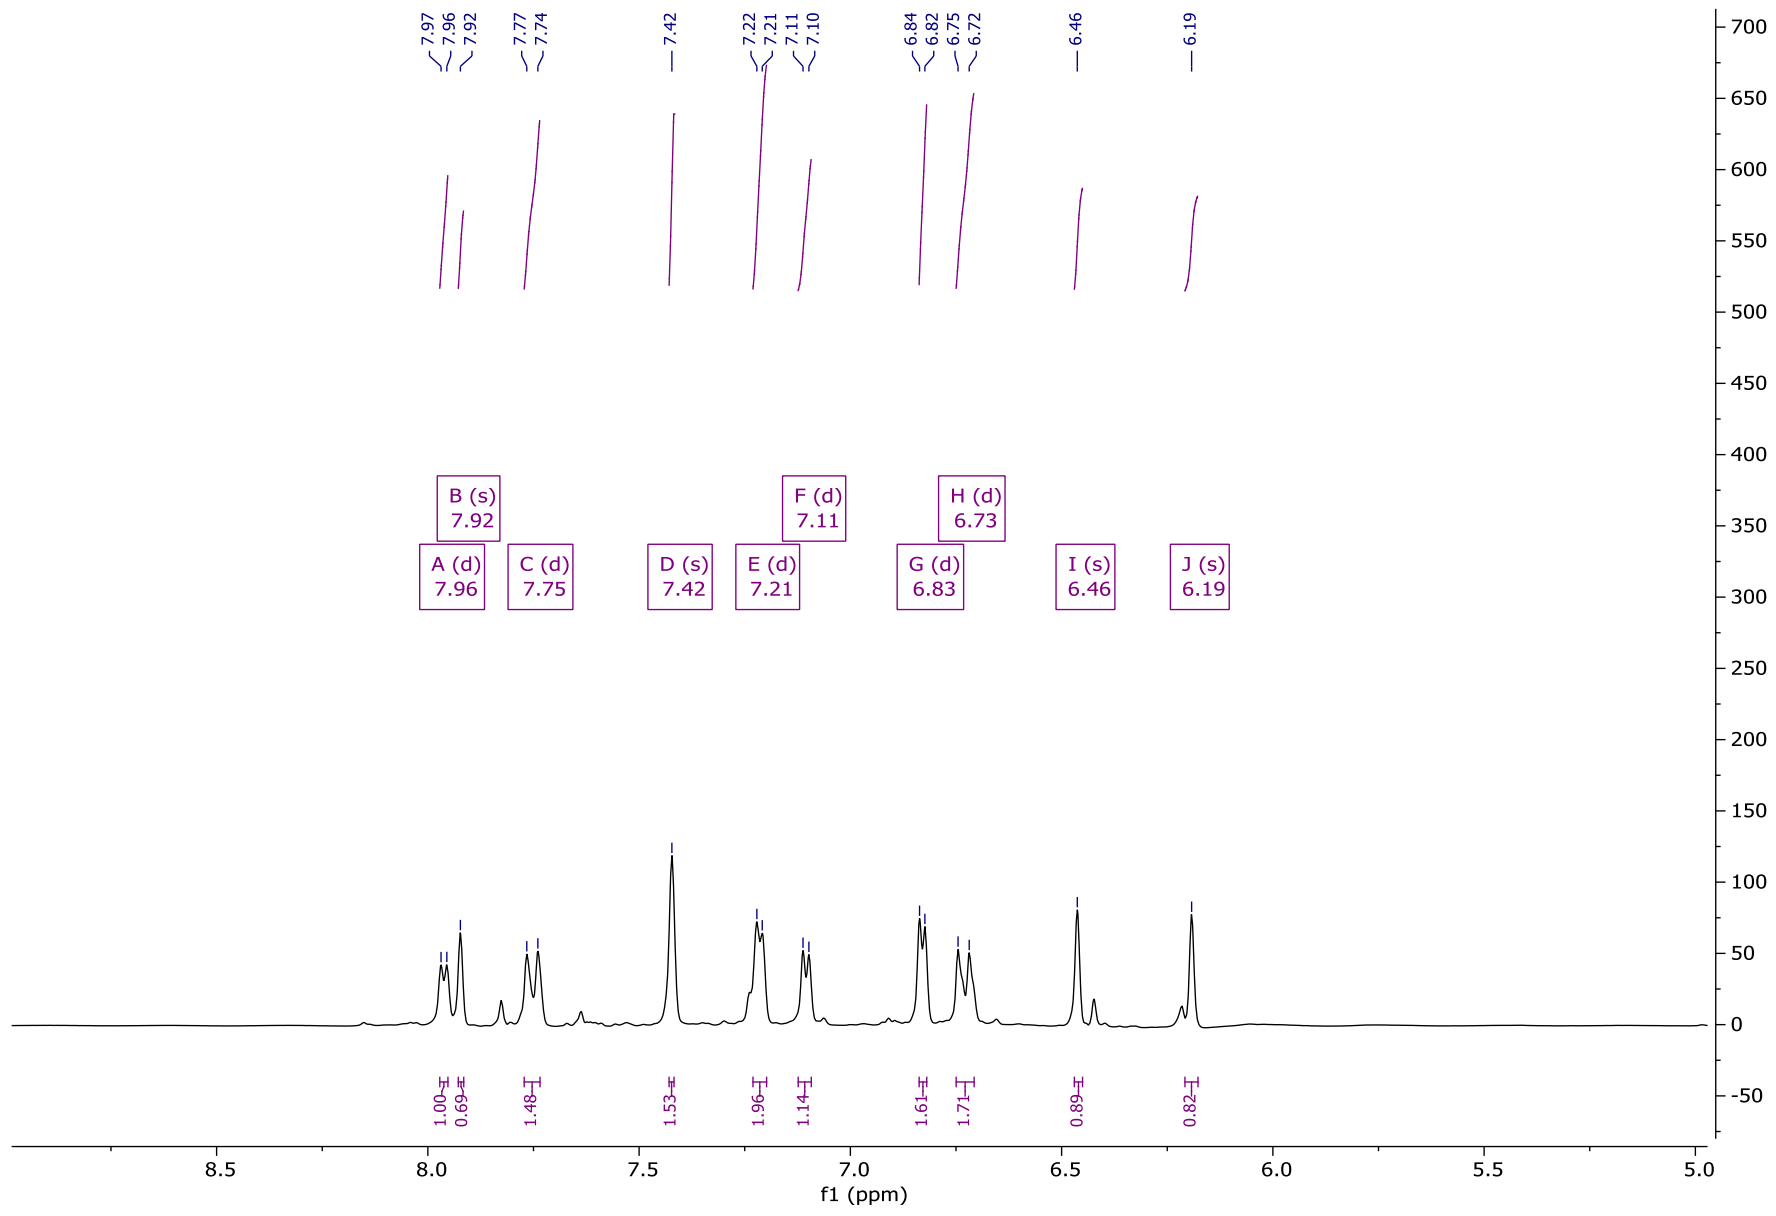

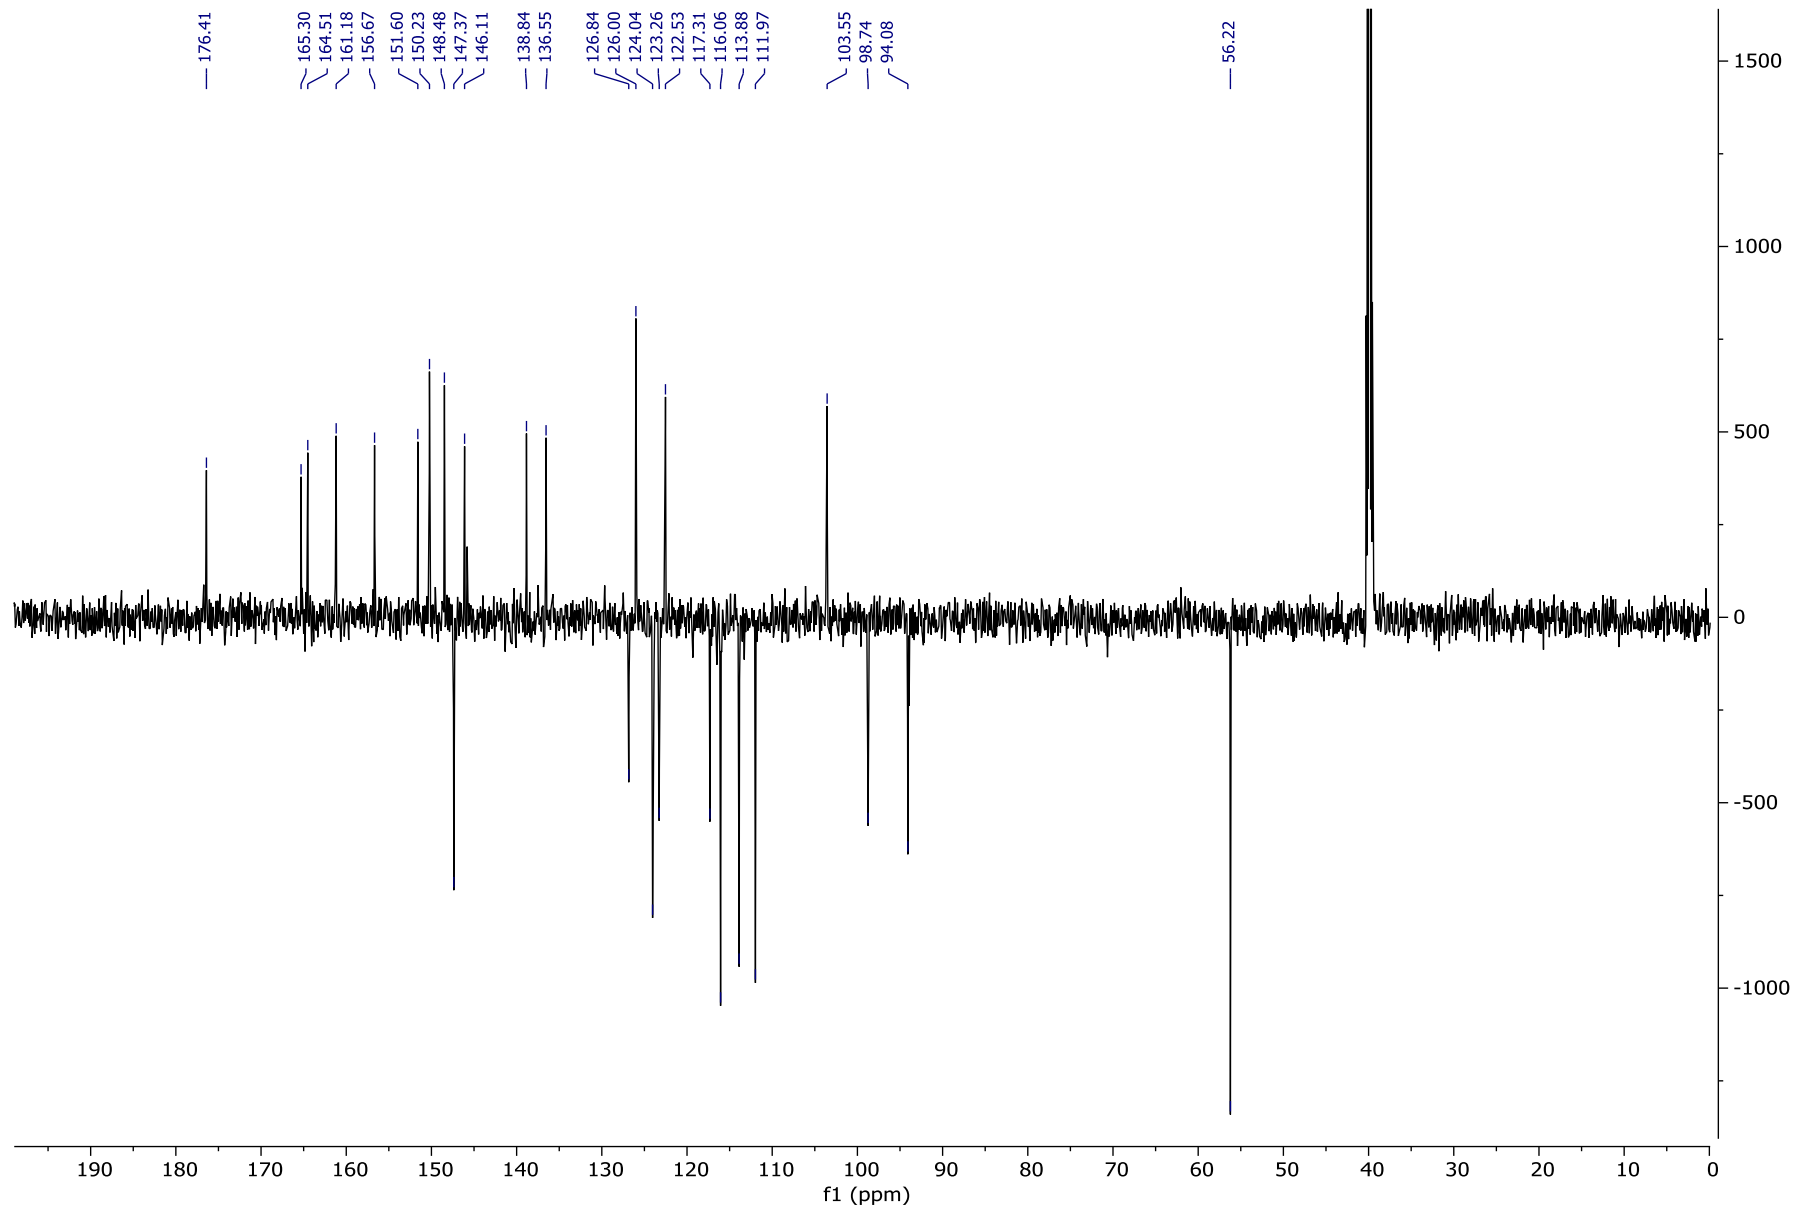



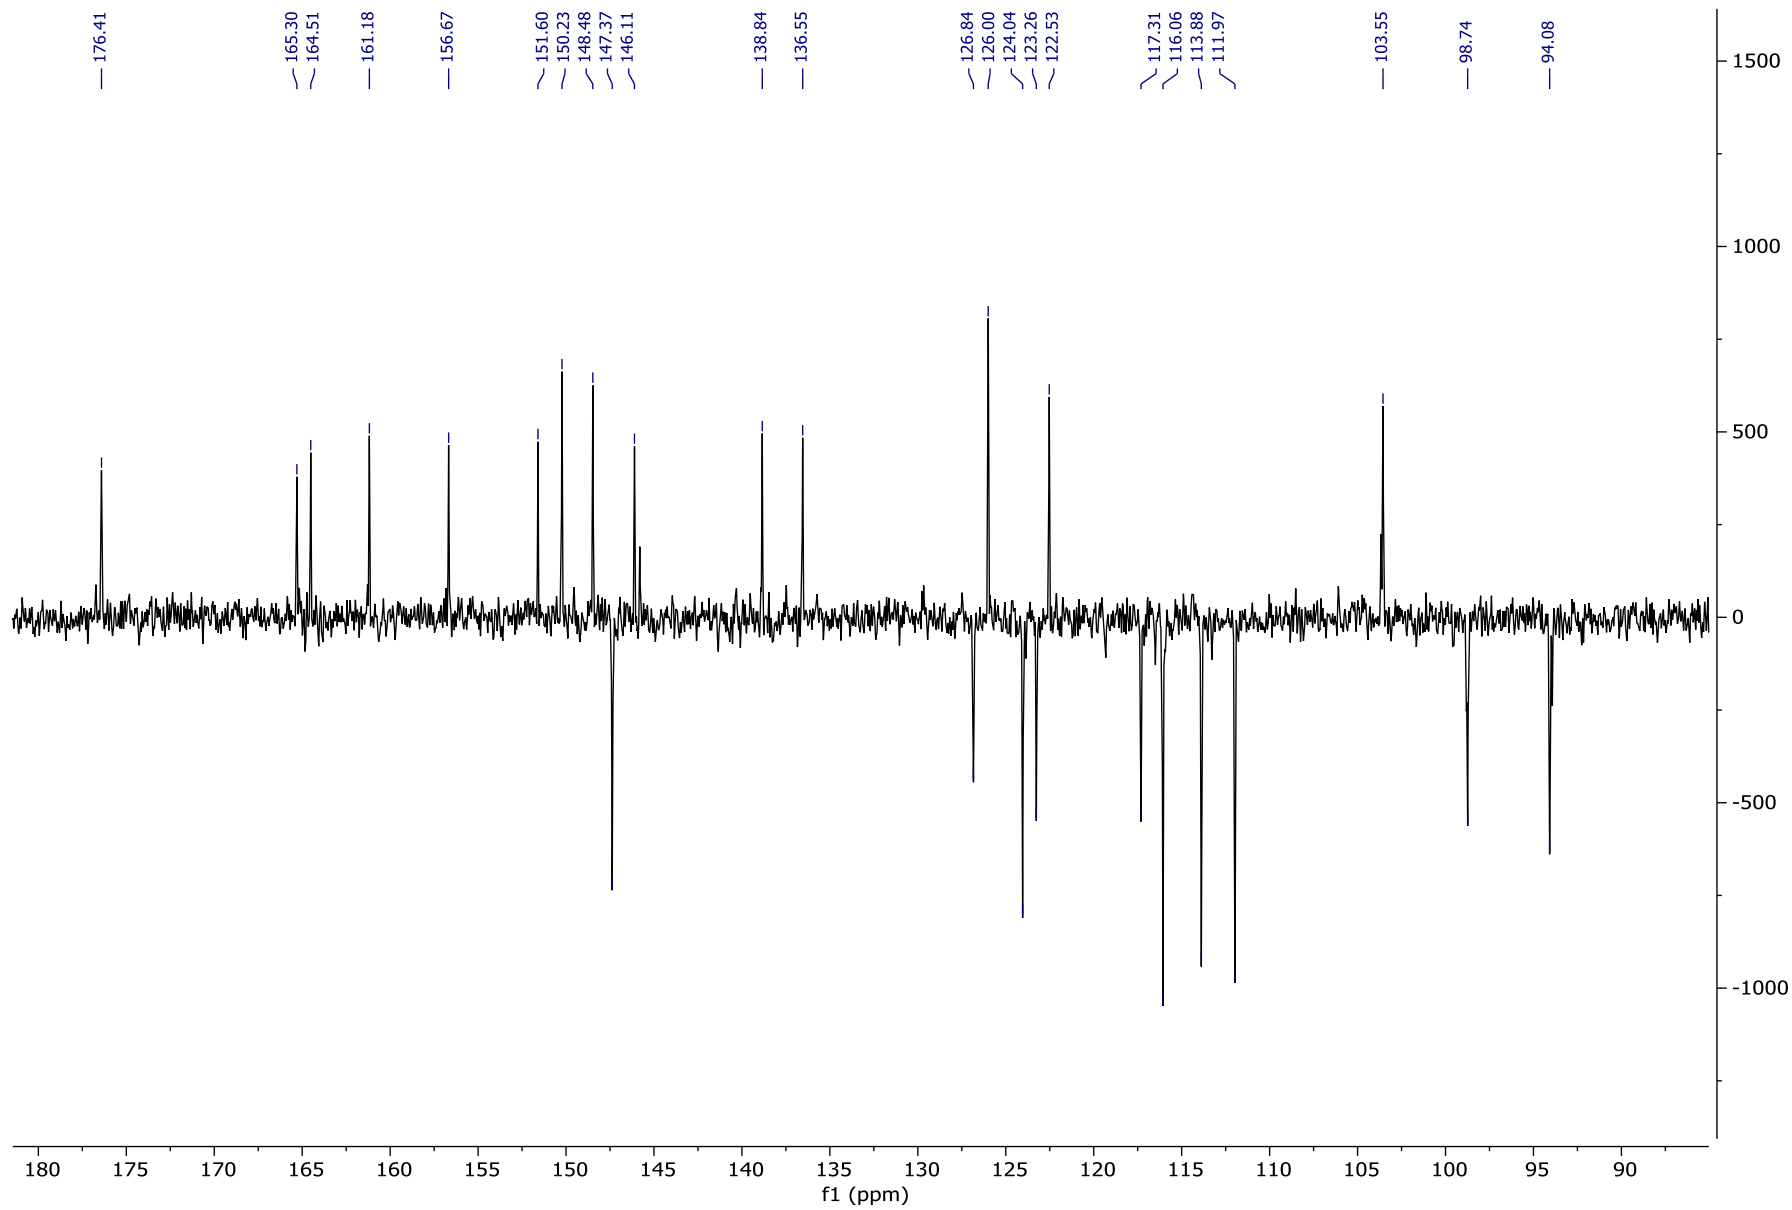

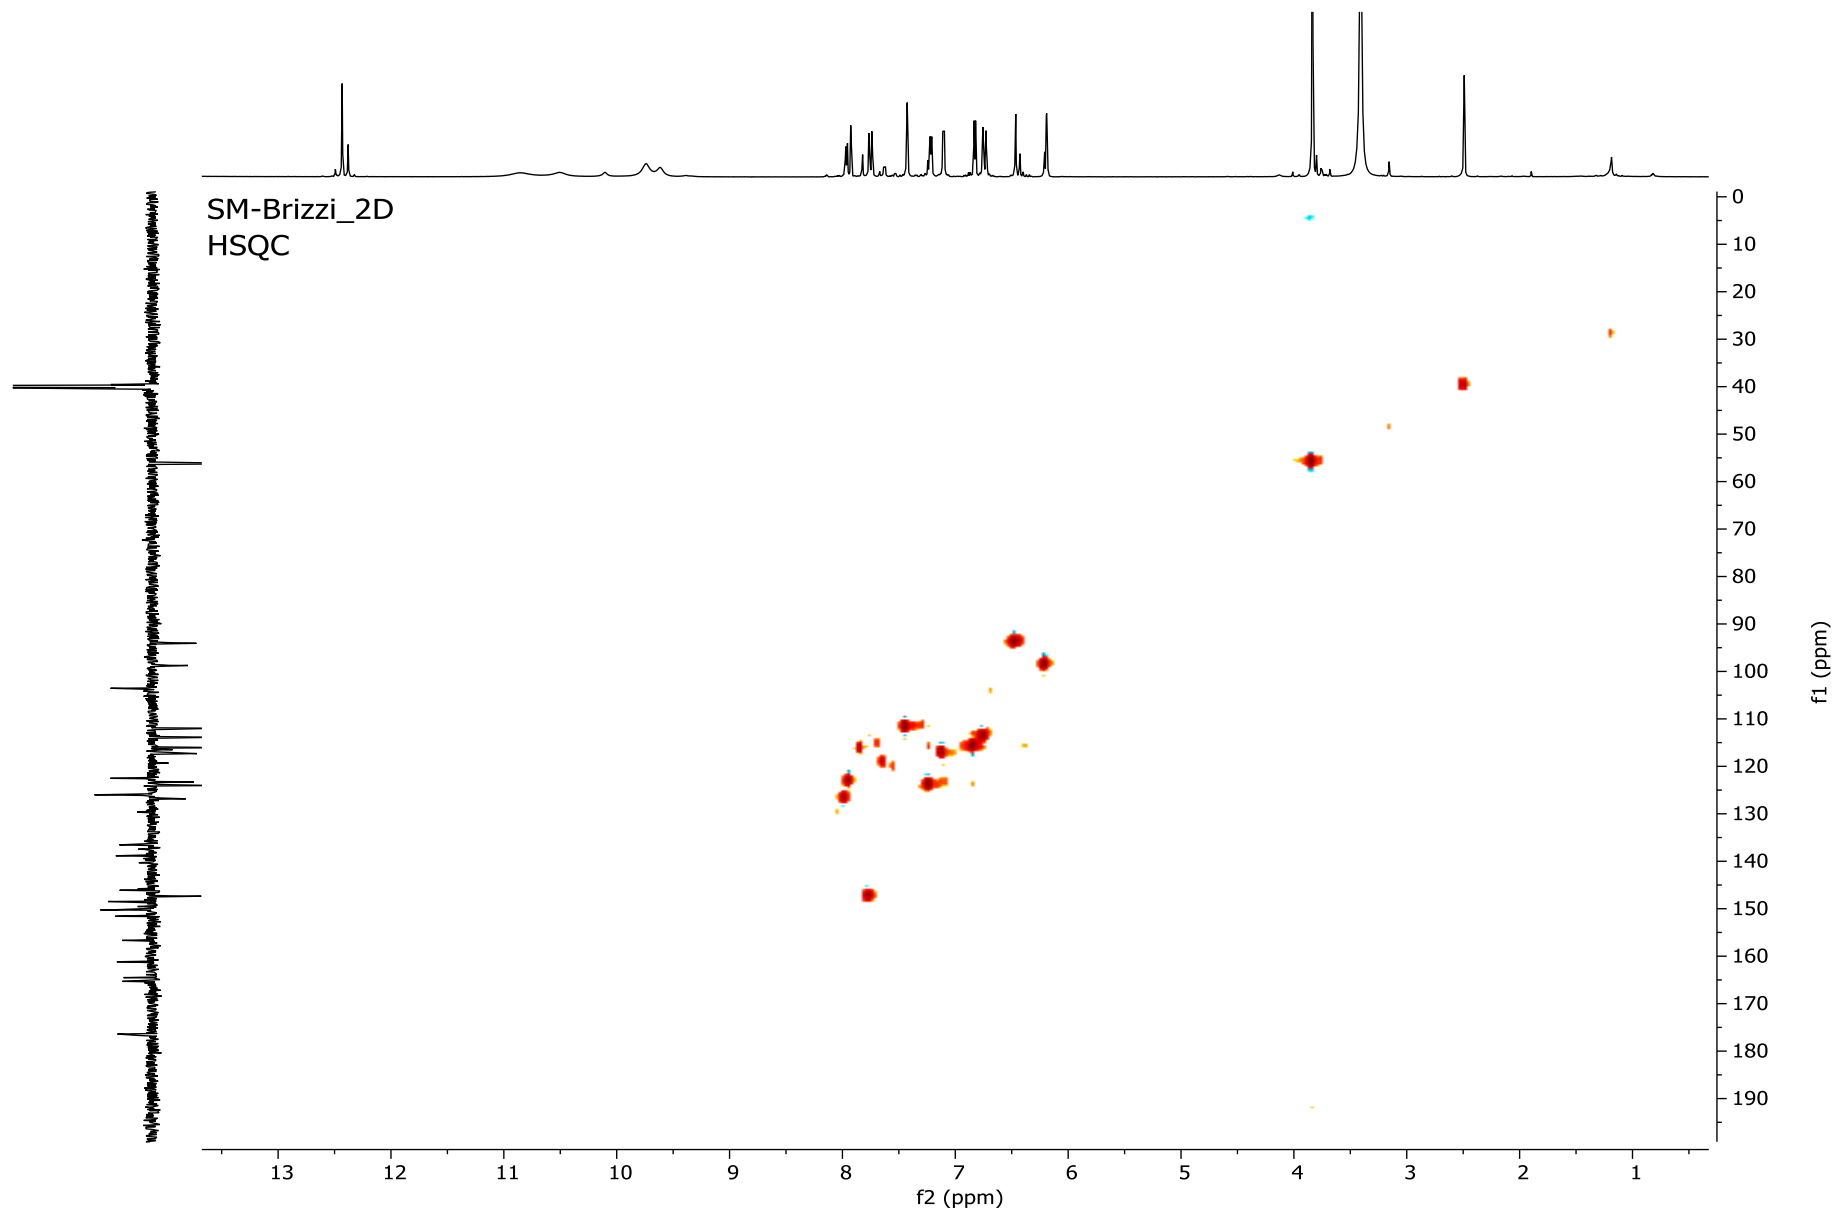

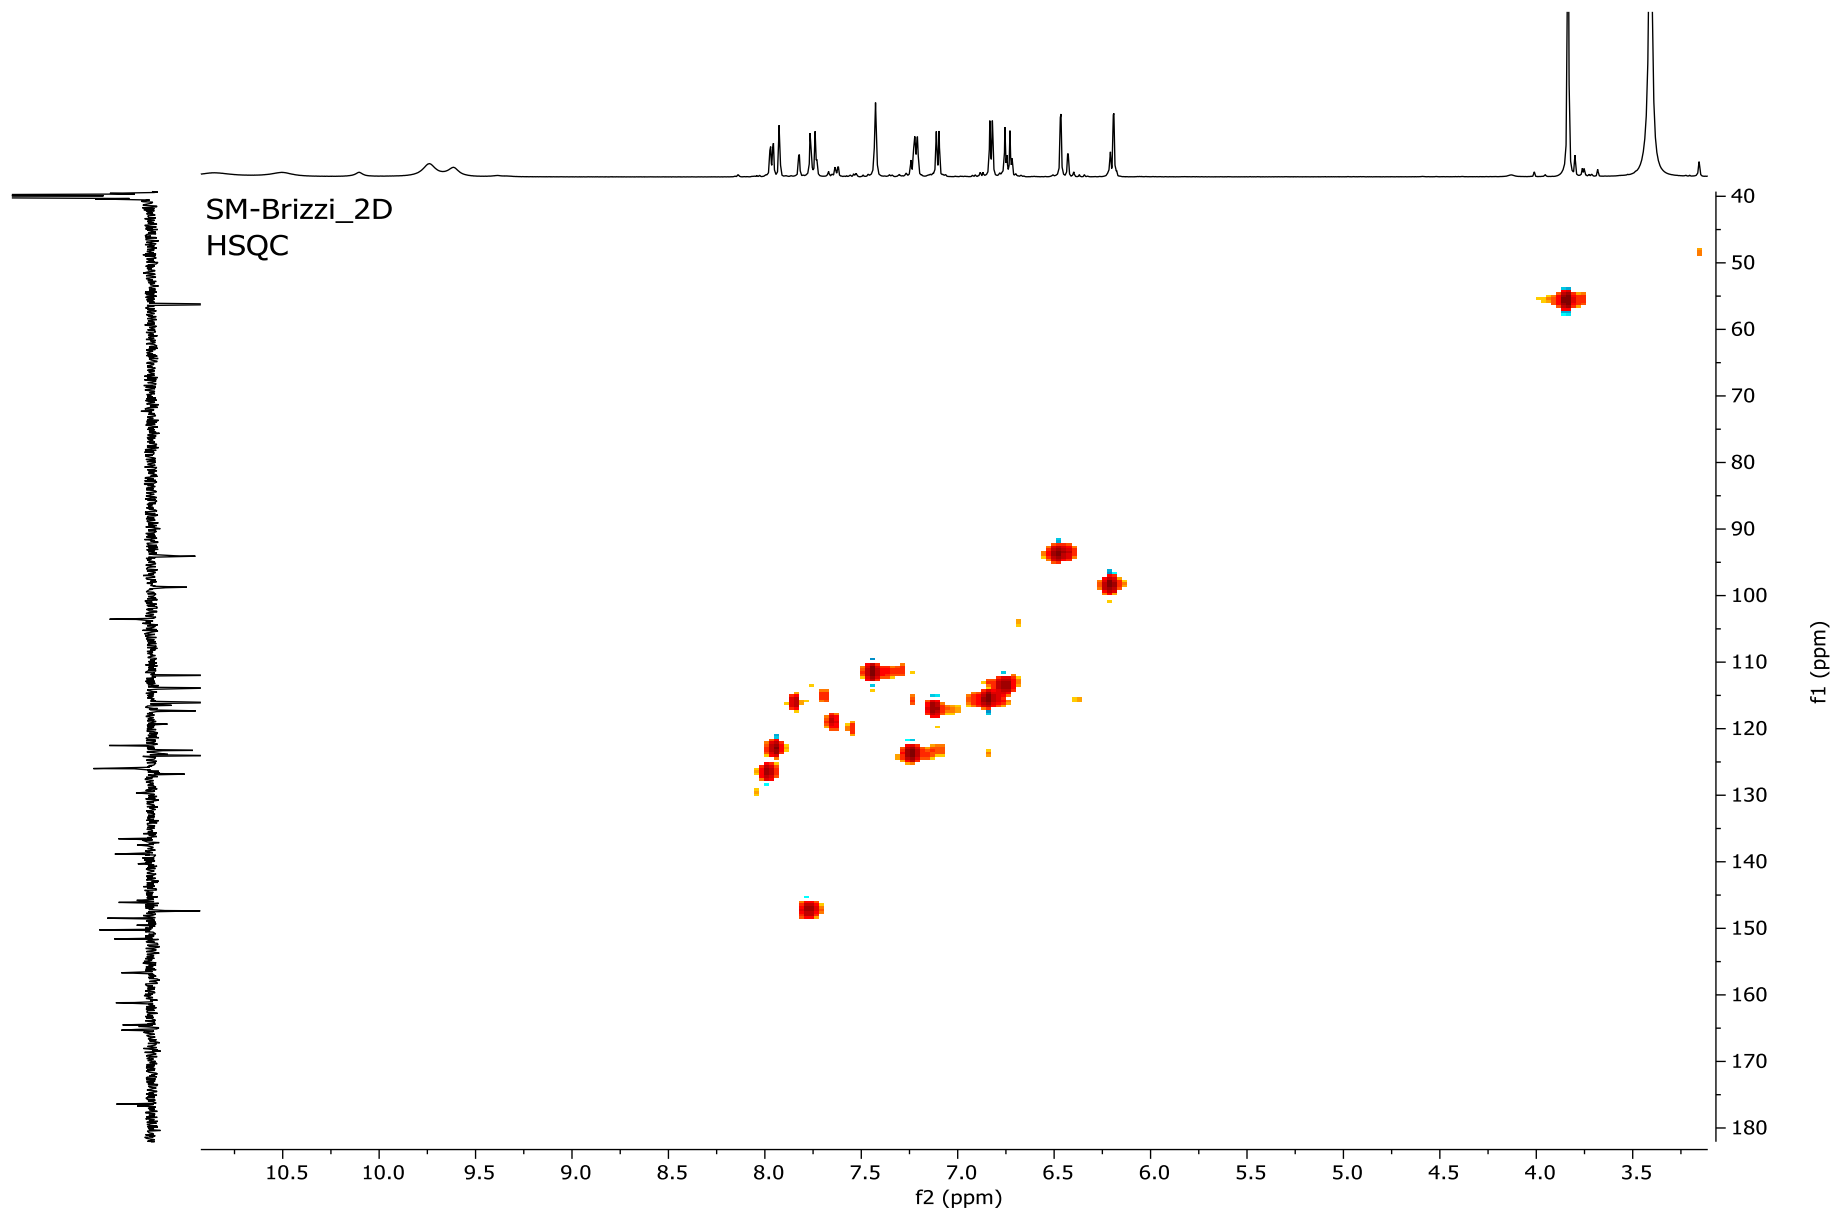

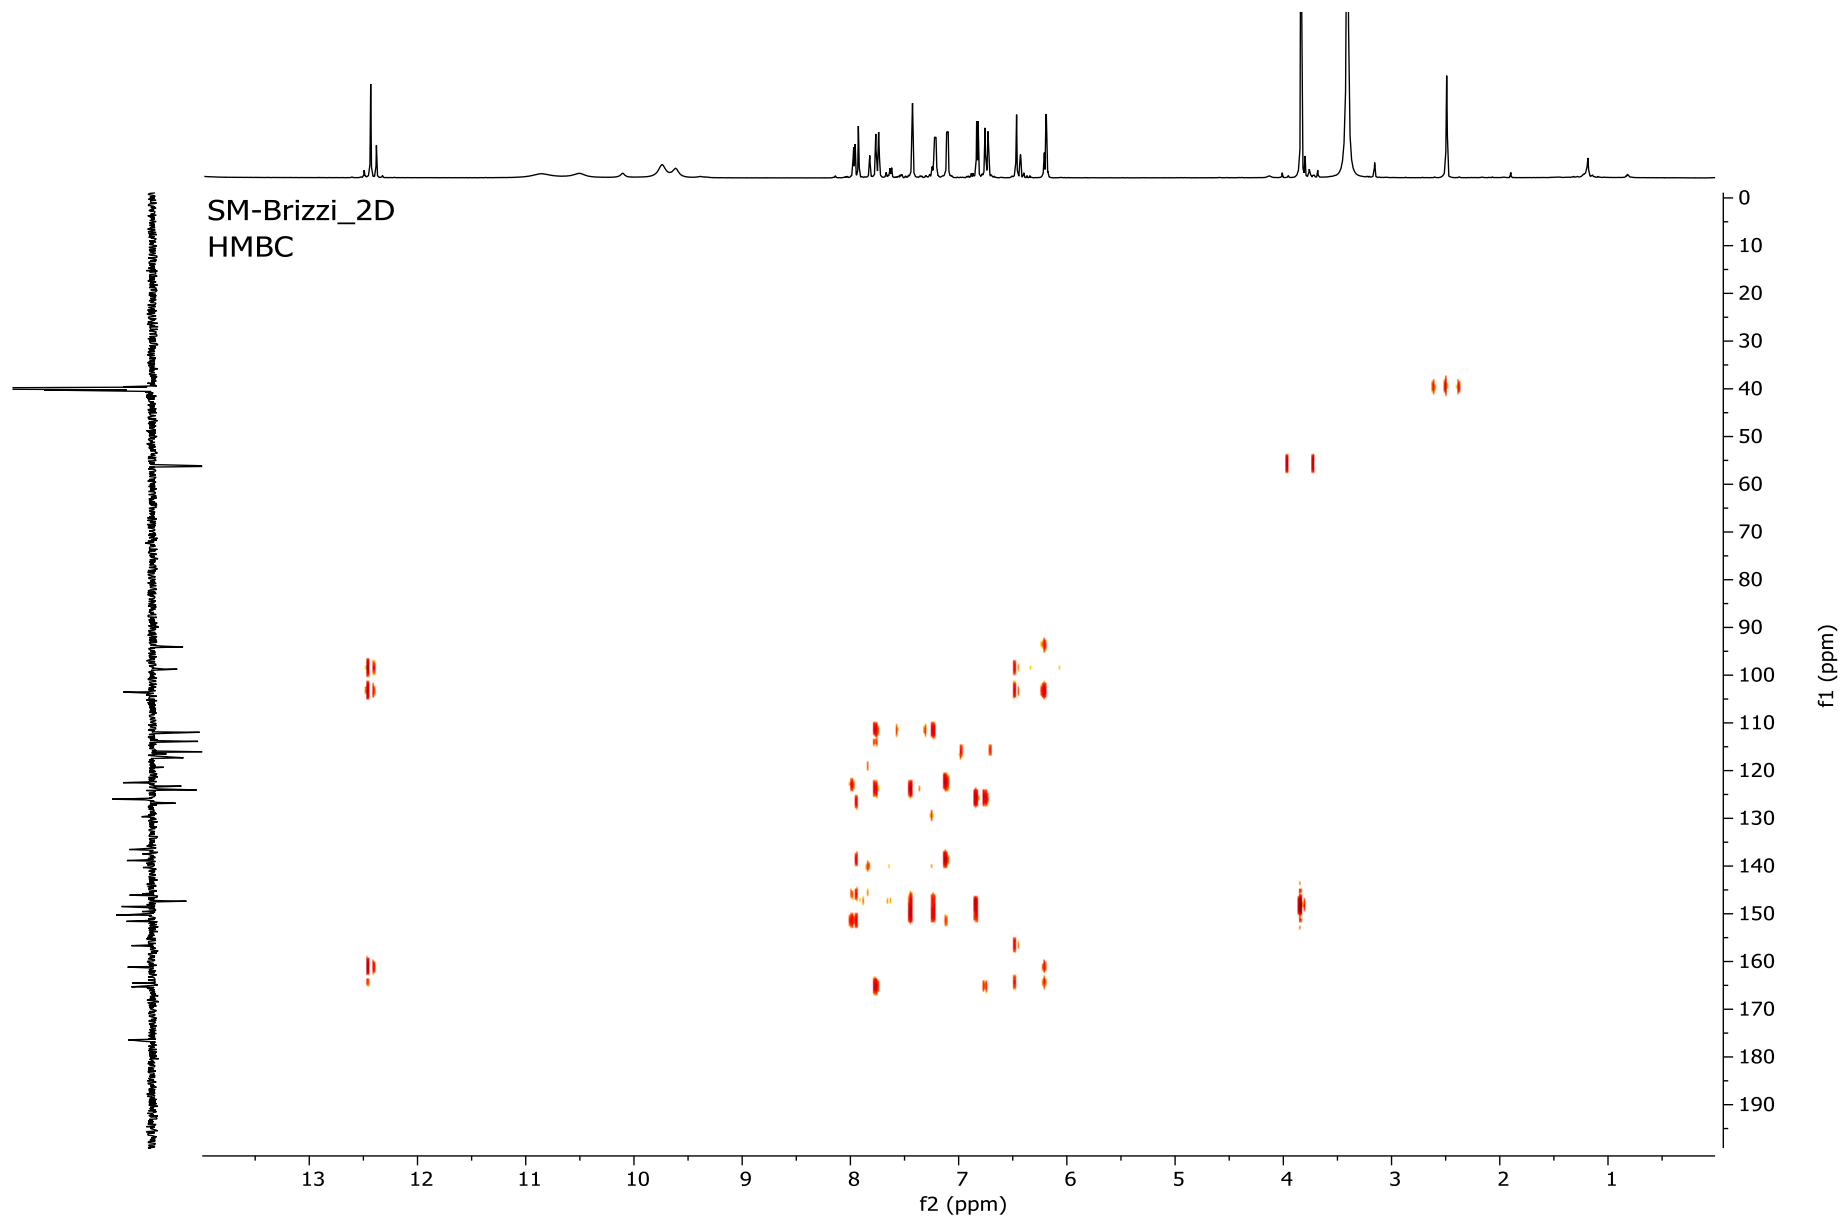

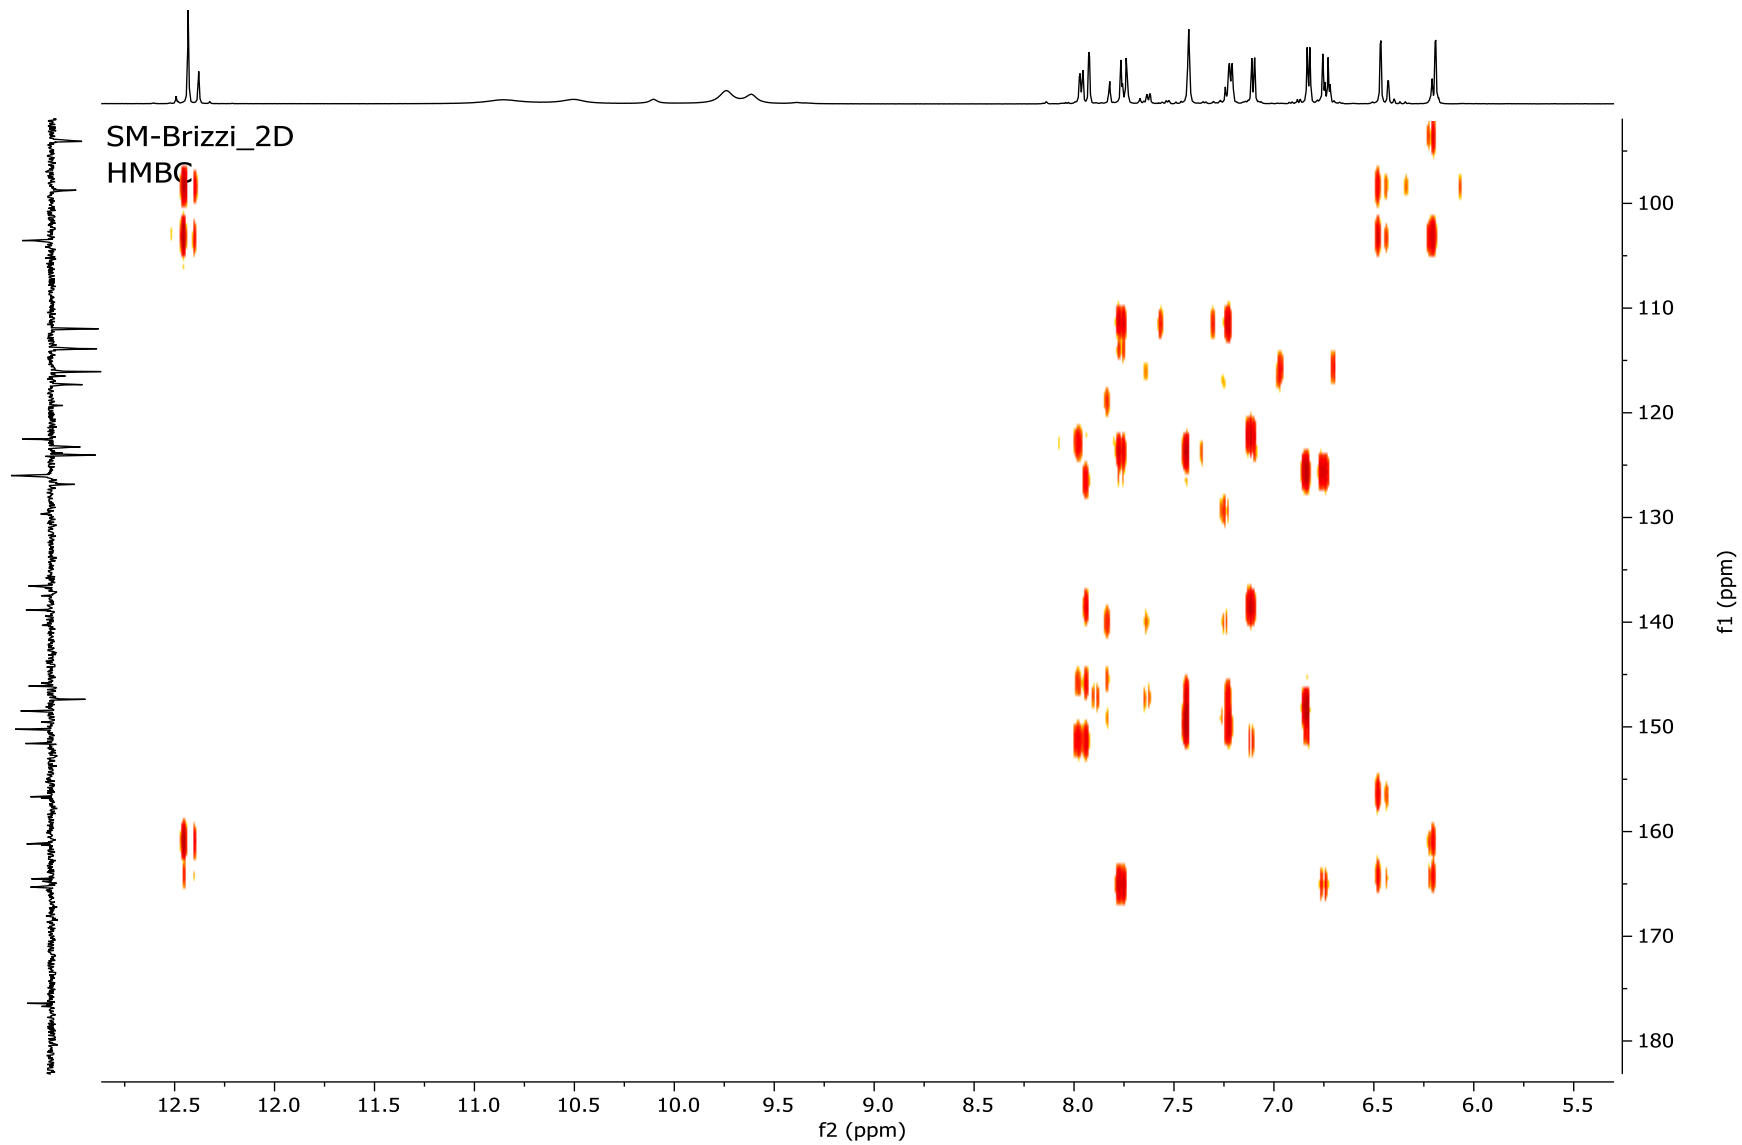

**Table S1.** K<sub>Ca</sub>1.1 channel-compounds **1** and **2** interaction network. The *consensus* binding residues are marked in bold.

| Compound                                      | Hydrophobic Interaction                                                   | Hydrogen bond                                                                      | π- Stacking                                  | π- Cationic | ΔG (Kcal/mol) |
|-----------------------------------------------|---------------------------------------------------------------------------|------------------------------------------------------------------------------------|----------------------------------------------|-------------|---------------|
| Compd. <b>1</b><br>(3'-O-feruloyl derivative) | Arg-395, <b>Tyr-402</b> ,<br><b>Lys-458</b> , <b>Phe-461</b> ,            | <b>Lys-300</b> , <b>Tyr-402</b> ,<br>Tyr-467                                       | <b>Tyr-398</b> , <b>Tyr-402</b> ,<br>Phe-461 | Lys-458     | -8,7          |
| Compd. <b>2</b><br>(4'-O-feruloyl derivative) | Arg-395, <b>Tyr-402</b> ,<br><b>Lys-458</b> , <b>Phe-461</b> ,<br>Glu-465 | <b>Lys-300</b> , <b>Tyr-398</b> ,<br><b>Tyr-402</b> , Glu-454,<br>Phe-466, Tyr-467 | <b>Tyr-398</b>                               | Lys-458     | -9,1          |
